# Supplementary material
Source: Research Square preprint supplement (doi:10.21203/rs.3.rs-10049130/v1)
Supplement: Supplementary file 1 [file 26400d8ffdce2506b29037f4.docx]

## Supplementary information

**Additional file 1.** Supplementary material (PDF/DOCX). Supplementary Figure S1 (model schematic); Supplementary Table S1 (detailed model input parameters with evidence status and caveats); Supplementary Table S2 (targeted extraction of randomized head-to-head recurrence estimates with use classification); Supplementary Table S3 (deterministic break-even recurrence relative risk across bleeding-harm assumptions).

**Additional file 2.** Reproducible model code (cancer_stroke_netbenefit_model.py, cancer_stroke_netbenefit_model_evidence.py, make_evidence_figures.py; seed 20260613).
