# Supplementary material
Source: Research Square preprint supplement (doi:10.21203/rs.3.rs-10049130/v1)
Supplement: Supplementary file 2 [file a8539beded34437cde164db4.docx]

# Supplementary Material (online data supplement)

*Manuscript: Anticoagulation versus Antiplatelet Therapy After Cancer-Associated Ischemic Stroke: A Net-Benefit Threshold Analysis.*

**Supplementary Table S1. Detailed model input parameters with evidence status and caveats** (including the net-benefit equation). Status vocabulary as in Table 1.

| **Parameter** | **Value** | **Range / distribution** | **Source** | **Use** | **Evidence status** | **Caveat** |
| --- | --- | --- | --- | --- | --- | --- |
| Time horizon | 0.5 y | structural assumption | Model design | Base-case horizon | Fixed (structural) | Short horizon reflects competing mortality; longer horizons would require a state-transition (Markov) extension. |
| Baseline recurrence under AP | 0.08 | varied via RR & horizon | Cancer-stroke literature 4 + cohorts | Baseline recurrence probability | Base-case assumption | Not an extracted point estimate; plausibility-anchored only. |
| AC recurrence RR | n/a (threshold variable) | det. verification value 1.00; PSA priors — legacy broad Uniform(0.40–1.10) (comparison only) + evidence-informed lognormal: ARCADIA-informed neutral (HR 1.00, 95% CI 0.64–1.55) and NAVIGATE-cancer-informed skeptical (HR 1.43, 95% CI 0.71–2.87) | Evidence-informed priors from extracted RCT head-to-head estimates (NAVIGATE-ESUS cancer subgroup 6; main ARCADIA trial 11); Pipek 2025 4 = ranking/directional anchor only | **Threshold variable** | NOT a fixed treatment effect. HRs used as relative-effect priors on the log scale (part of the indirectness of the evidence). Upper bound not truncated (net harm retained). Full extraction in Supplementary Table S2. |  |
| Excess major bleeding with AC | 0.02 (base) | Triangular(0.00, 0.02, 0.08) | No clear difference 4,7; observational signals (upper tail) | Bleeding-harm axis | Scenario range; not a fixed point estimate | Arm-level event counts are sparse, so this is not an established point estimate; the ARCADIA cancer post hoc major-hemorrhage values were not adopted as fixed inputs. |
| ICH fraction among major bleeds | 0.30 (base) | scenario low / intermediate / high | Scenario parameter | Severity weight of bleeds (*W*) | Scenario range; not a fixed point estimate | Arm-level ICH counts sparse; high-ICH scenario by anticoagulant type / brain involvement. |
| Weighted bleeding harm *W* | 0.14 | derived | Computed | Converts bleeding into utility loss | Derived | *W* = (1 − ICH frac)·d_bleed + ICH frac·d_ICH; changes if components change. |
| 6-month competing mortality | 0.30 (base) | Triangular(0.20, 0.30, 0.45) | Lee et al. 2023 Taipei VGH 12; range SCAN 13/ASTRAL 14; high Navi 2014 3/Oka 2025 15 | Competing-risk attenuation of net benefit | Interpolated scenario parameter | 6-month value not directly observed (interpolated between the confirmed 30-day 17.9% and 1-year 51.3% mortality, CAS n=39). Non-differential between strategies in the base case; strategy-specific fatality or differential-mortality assumptions were not modeled as primary inputs. Note: the short-term mortality endpoint is labeled "30-day" in the abstract Results but "discharge mortality" in the abstract Methods, so it was treated conservatively as a scenario anchor; a 1-year recurrence value is not reported in the abstract. |
| mRS utility anchors (EQ-5D-3L) | 0.90 / 0.82 / 0.70 / 0.54 / 0.24 / −0.14 (mRS 0–5); death = 0 | fixed anchors (PSA varies event disutilities, not the anchors) | Ali et al. 2017 16 (PMC6027777), UK EQ-5D-3L value set, Supplement III | mRS health-state utilities | Locked anchor | UK column from Supplement III; endpoint values (mRS 0 = 0.90, mRS 5 = −0.14) consistent with abstract-reported ranges (mRS 0 mean 0.88–0.95; mRS 5 mean −0.48 to 0.22). |
| Recurrent stroke disutility | 0.20 (base) | Triangular(0.10, 0.20, 0.35) | Pragmatic scenario input informed by the mRS utility anchors reported by Ali et al. 16; Rivero-Arias 17 = methodology only | Utility loss of recurrent ischemic event | Pragmatic scenario input | Informed by the mRS utility anchors; NOT a directly extracted value; varied over a wide prespecified range. |
| Major bleeding disutility | 0.05 (base) | Triangular(0.02, 0.05, 0.10) | Pragmatic scenario input informed by the mRS utility anchors reported by Ali et al. 16; Rivero-Arias 17 = methodology only | Utility loss of major bleed | Pragmatic scenario input | Informed by anchors; NOT a directly extracted value; varied over a wide range. |
| ICH disutility | 0.35 (base) | Triangular(0.20, 0.35, 0.55) | Pragmatic scenario input informed by the mRS utility anchors reported by Ali et al. 16; Rivero-Arias 17 = methodology only | Utility loss of intracranial hemorrhage | Pragmatic scenario input | Informed by anchors; NOT a directly extracted value; varied over a wide range. |
| Net benefit equation | INB | INB = horizon × (1 − mortality) × [ p_recur_AP (1−RR) d_recur − excessBleed × *W* ] | Model definition | Primary model output (QALY) | Fixed (structural) | Costs excluded; utility-weighted clinical net benefit only. |


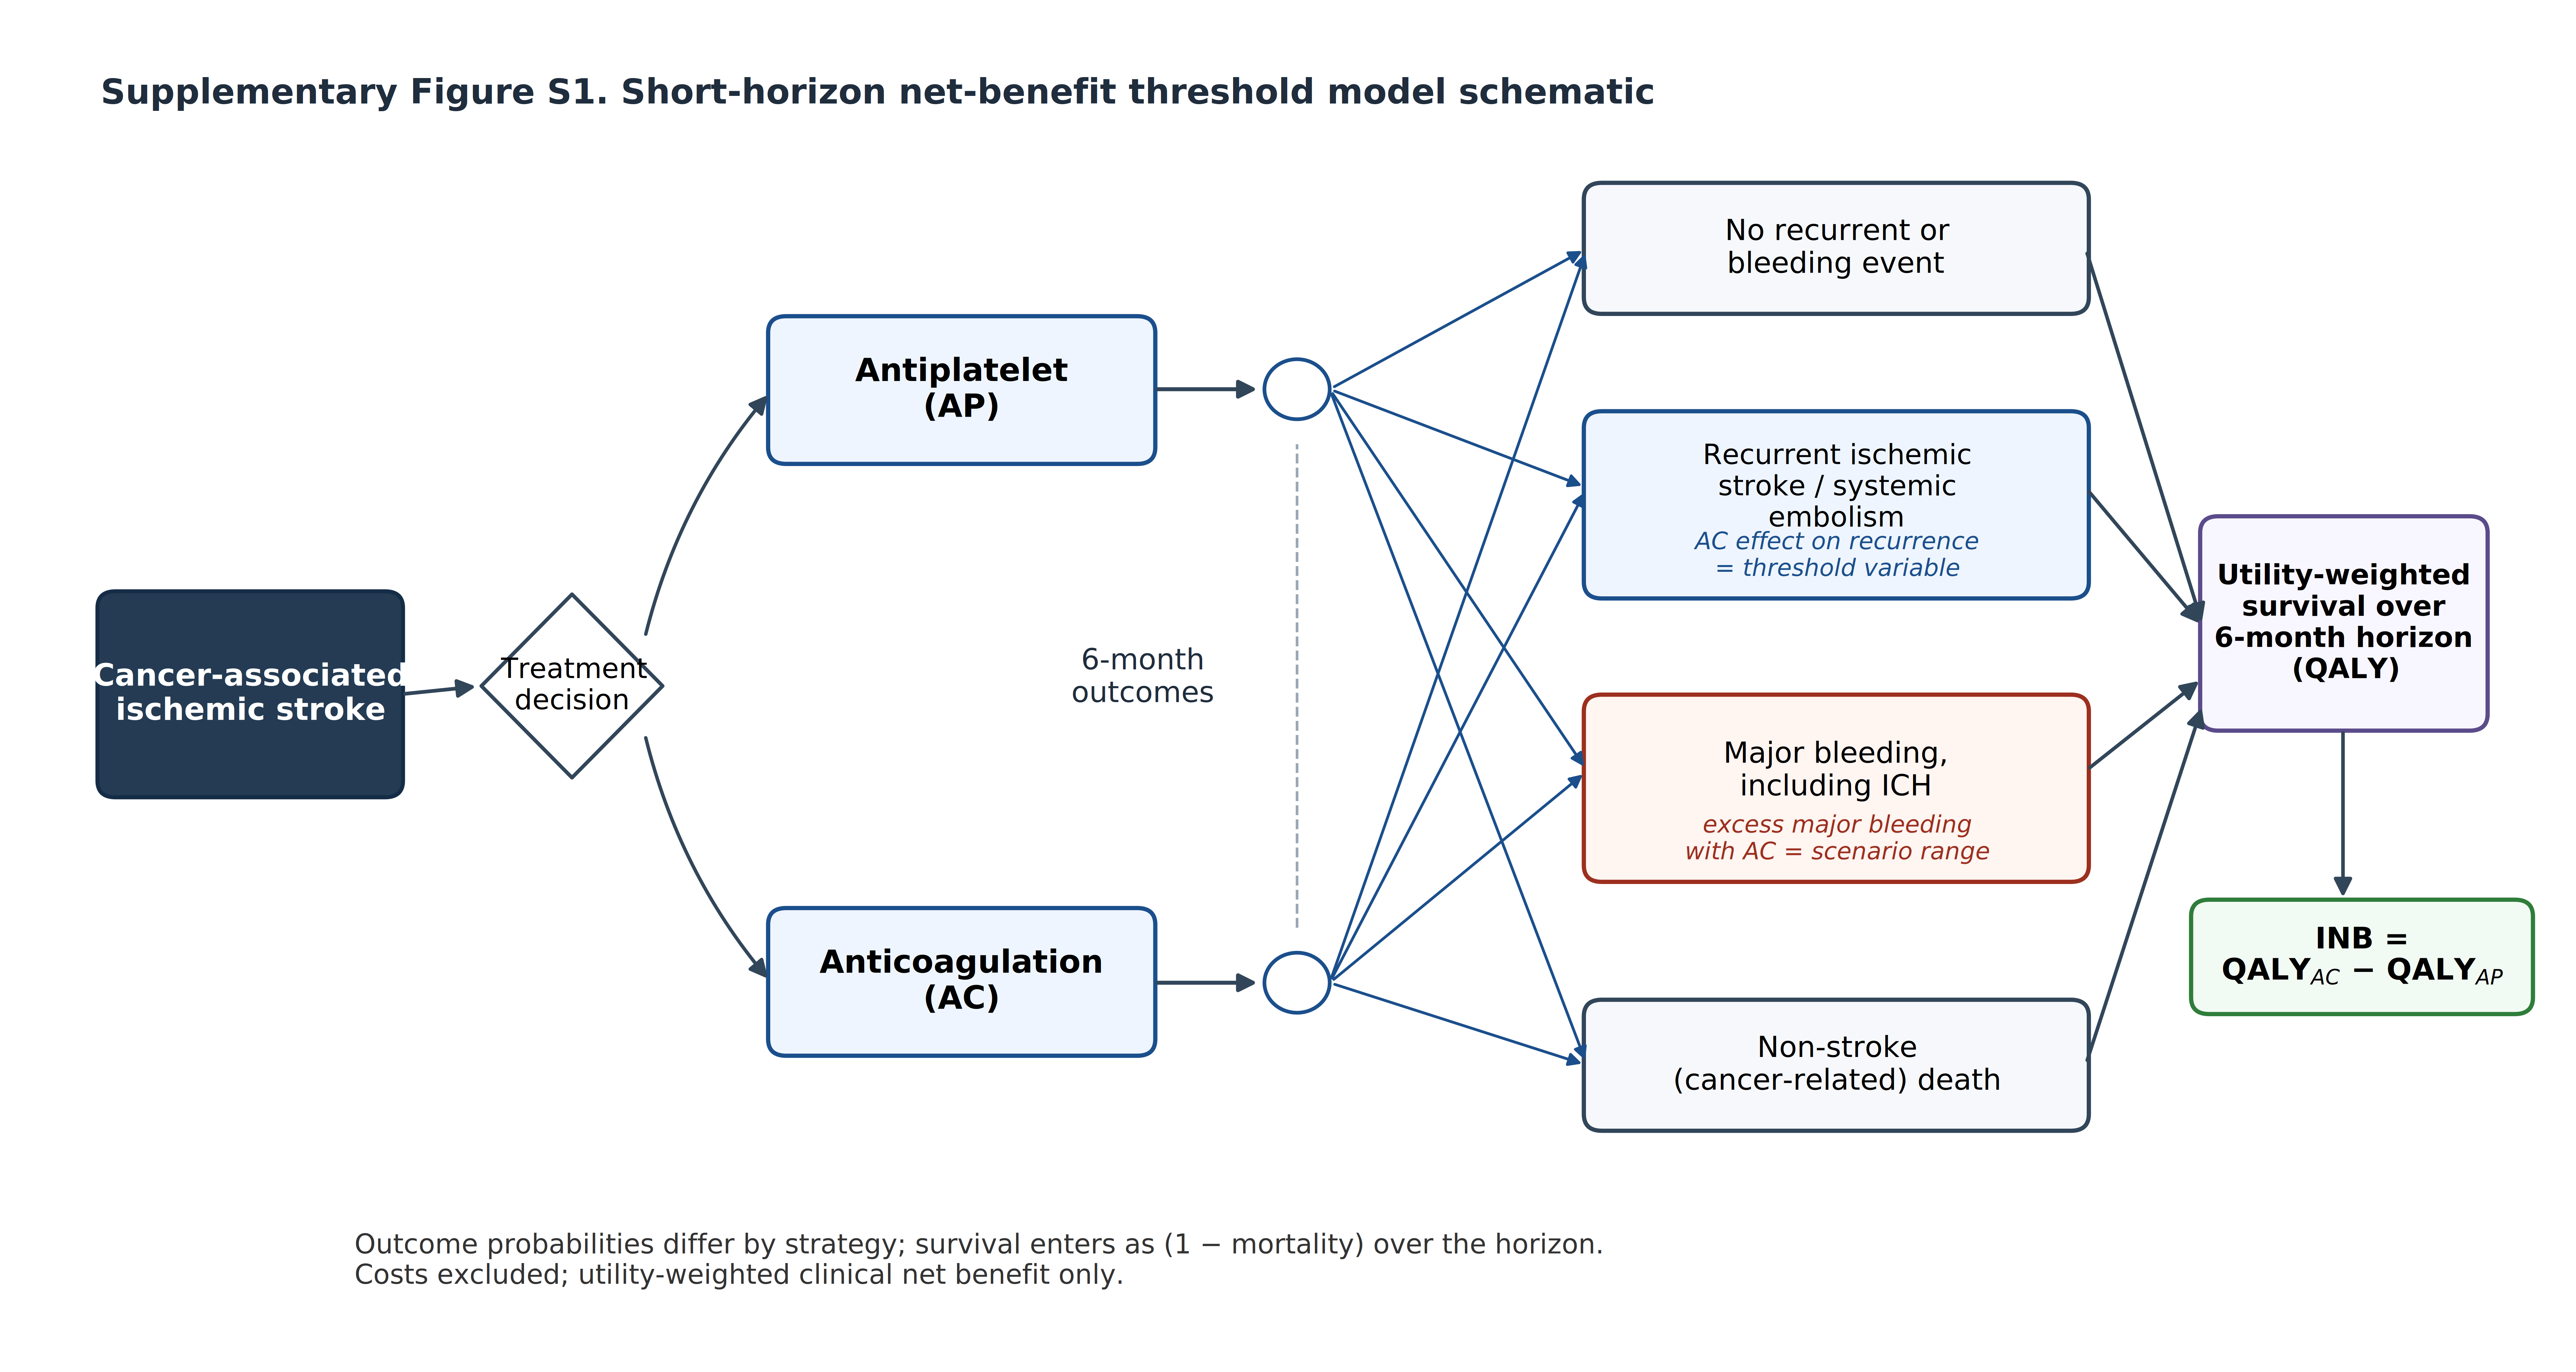


**Supplementary Figure S1. Schematic of the short-horizon net-benefit threshold model.** The decision is between antiplatelet therapy and anticoagulation in a patient with cancer-associated ischemic stroke. From each strategy, four mutually exclusive 6-month outcomes are modelled — no recurrent or bleeding event, recurrent ischemic stroke or systemic embolism, major bleeding including intracranial hemorrhage, and non-stroke (cancer-related) death — each weighted by modified Rankin Scale–based utilities to yield utility-weighted survival (QALY) over the horizon, from which the incremental net benefit (INB = QALY_AC − QALY_AP) is derived. Outcome probabilities differ by strategy: the anticoagulation effect on recurrence is treated as a threshold variable and the excess major bleeding with anticoagulation as a scenario range. Survival enters as (1 − mortality) over the horizon, and costs are excluded. This is a short-horizon decision structure, not a state-transition (Markov) or cost-effectiveness model.

**Supplementary Table S2. Targeted extraction of randomized head-to-head estimates of recurrent stroke (anticoagulation versus antiplatelet) in cancer-relevant populations, with classification for use in the model.** All values were verified against the cited source; non-extractable values are flagged rather than imputed, and no hazard ratio or confidence interval was invented.

| **Source** | **Design** | **Population** | **Comparison** | **Recurrence estimate (AC vs AP)** | **Bleeding (as reported)** | **Use in model** |
| --- | --- | --- | --- | --- | --- | --- |
| NAVIGATE-ESUS cancer subgroup 6 | RCT, pre-specified subgroup | ESUS with cancer (n = 543; mostly cancer history, ~9% active); follow-up ~11 mo | Rivaroxaban 15 mg vs aspirin 100 mg | HR 1.43 (95% CI 0.71–2.87); 7.7% vs 5.4% | Major bleeding nonsignificantly higher with rivaroxaban | Evidence-informed **skeptical** prior; primary break-even marker |
| Main ARCADIA trial 11 | RCT | Cryptogenic stroke with atrial cardiopathy (n = 1015; **not** cancer-specific); follow-up 1.8 y | Apixaban (5/2.5 mg) vs aspirin 81 mg | HR 1.00 (95% CI 0.64–1.55); ~4.4%/y both arms | Symptomatic ICH 0 vs 7; other major hemorrhage HR 1.02 (0.29–3.52) | Evidence-informed **neutral** prior; context break-even marker |
| ARCADIA cancer-history subgroup 7 | RCT, post hoc subgroup | Cryptogenic + atrial cardiopathy + cancer history (n = 137) | Apixaban vs aspirin | Crude ≈ 0.69 (5 [8.2%] vs 9 [11.8%]); no formal HR; underpowered | Major hemorrhage 1 (1.6%) vs 2 (2.6%) | **Exploratory only** (no interval); overlay annotation, not a prior |
| Pipek network meta-analysis 4 | Systematic review + network meta-analysis | Cancer-associated stroke (11 studies; n = 1319) | Network vs no treatment | Antiplatelet RR 0.44 (0.20–0.96) and LMWH RR 0.50 (0.26–0.96) vs no treatment; antiplatelet ranked highest (primary analysis); no extractable AC-vs-AP pairwise estimate | No difference in major bleeding or mortality | **Ranking/directional anchor only** |
| TEACH pilot 5 | Pilot feasibility RCT | Active cancer + ischemic stroke (n = 20) | Enoxaparin vs aspirin | Not usable (feasibility; 60% crossover) | Major bleeding 1 vs 3; no ICH | **Not usable** for effect; feasibility footnote |

**Break-even positioning.** At the base-case 2% excess major-bleeding assumption the break-even relative risk was 0.825. The two formally estimable contrasts lay at or above this threshold (main ARCADIA 1.00; NAVIGATE-ESUS cancer 1.43); the only estimate below it (ARCADIA cancer-history crude ≈ 0.69) lacked a formal interval and was underpowered, and all estimable intervals crossed both the break-even and the null. The indirect ratio derivable from the Pipek versus-no-treatment estimates (0.50/0.44 ≈ 1.14) has no valid confidence interval and was therefore not used as a prior or plotted as a point estimate. Hazard ratios were used as recurrence relative-effect priors on the log scale, treated as part of the indirectness of the evidence rather than as a direct pooled relative-risk estimate.

**Supplementary Table S3. Deterministic break-even recurrence relative risk across bleeding-harm assumptions.** Each value is the recurrence relative risk at which incremental net benefit equals zero (the break-even), computed from the locked deterministic formula break-even relative risk = 1 − (excess major bleeding × W) / (baseline recurrence × recurrence disutility), with baseline recurrence 0.08 and recurrence disutility 0.20 held at base case. Anticoagulation is net-beneficial below the tabulated relative risk and antiplatelet therapy at or above it. This table expresses Figure 1 numerically and introduces no new evidence.

| **Excess major bleeding with AC** | **Break-even RR (low-harm, W = 0.047)** | **Break-even RR (base-case, W = 0.140)** | **Break-even RR (high-harm, W = 0.325)** |
| --- | --- | --- | --- |
| 0% | 1.000 | 1.000 | 1.000 |
| 1% | 0.971 | 0.912 | 0.797 |
| 2% | 0.941 | 0.825 | 0.594 |
| 4% | 0.883 | 0.650 | 0.188 |
| 8% | 0.765 | 0.300 | — (AC not net-beneficial at any modelled RR) |

W = (1 − ICH fraction) × major-bleeding disutility + ICH fraction × ICH disutility. Low-harm: ICH fraction 0.15, disutilities 0.02/0.20. Base-case: ICH fraction 0.30, disutilities 0.05/0.35 (W = 0.14). High-harm: ICH fraction 0.50, disutilities 0.10/0.55. The base-case column reproduces the manuscript break-even (0.825 at 2% excess bleeding). A dash indicates that anticoagulation cannot reach net benefit within the modelled recurrence range.

## Reproducible model code

- cancer_stroke_netbenefit_model.py — net-benefit threshold model (deterministic checks, two-way threshold surface, legacy PSA N = 10,000, seed 20260613).
- cancer_stroke_netbenefit_model_evidence.py — evidence-informed PSA under the three recurrence-effect priors (legacy broad; ARCADIA-informed neutral; NAVIGATE-cancer-informed skeptical), reproducing P(AC favored) = 0.44 / 0.12 / 0.04 (seed 20260613).
- make_evidence_figures.py — generates Figure 2 (three-prior PSA) and Figure 3 (break-even overlay) from the locked model arrays and the verified extracted estimates.
- make_supp_S1_S3.py — computes the Supplementary Table S3 break-even grid from the locked deterministic formula (the Supplementary Figure S1 schematic is provided as a vector SVG with a 600-dpi TIFF export).

*All reported figures and probabilistic results are reproducible by running the model scripts with the stated seed (20260613).*
